# Supplementary material for: First 24-Membered Macrocyclic 1,10-Phenanthroline-2,9-Diamides—An Efficient Switch from Acidic to Alkaline Extraction of f-Elements
Source: MDPI journal article supplement (doi:10.3390/ijms241210261), 2023-06-17
Supplement: s1 [file s1]

## Supplementary information for

### First 24-membered macrocyclic 1,10-phenanthroline-2,9-diamides – an efficient switch from acidic to alkaline extraction of *f*-elements

**Pavel S. Lempert,<sup>1</sup> Valentine S. Petrov,<sup>1</sup> Petr I. Matveev,<sup>1</sup> Uliana M. Leksina,<sup>1</sup> Vitaly A. Roznyatovsky,<sup>1</sup> Alexandr V. Yatsenko,<sup>1</sup> Viktor A. Tafeenko,<sup>1</sup> Pavel V. Dorovatovskii,<sup>2</sup> Viktor N. Khrustalev,<sup>3,4</sup> Gleb S. Budylin,<sup>5</sup> Evgeny A. Shirshin,<sup>6</sup> Vitaliy Yu. Markov,<sup>1</sup> Alexey A. Goryunkov,<sup>1</sup> Vladimir G. Petrov,<sup>1</sup> Yuri A. Ustynyuk,<sup>1</sup> Valentine G. Nenajdenko<sup>1\*</sup>**

<sup>1</sup> Department of Chemistry, Lomonosov Moscow State University, Leninskie Gory 1 bld. 3, Moscow 119991, Russia; lempert.pavel@yandex.ru (P.S.L.); vs.petrov25@gmail.com (V.S.P.); ulya-na-air@yandex.ru (U.M.L.); petr.i.matveev@gmail.com (P.I.M.); vit.rozn@nmr.chem.msu.ru (V.A.R.); gloriozov@nmr.chem.msu.ru (I.P.G.); yatsenko\_msu@mail.ru (A.V.Y.); tafeenko-victor@yandex.ru (V.A.T.); markoff5@yandex.ru (V.Y.M.); aag@thermo.chem.msu.ru (A.A.G.); vladimir.g.petrov@gmail.com (V.G.P.); yuriustynyuk@gmail.com (Y.A.U.)

<sup>2</sup> National Research Center “Kurchatov Institute”, Moscow 123182, Russia; paulgemini@mail.ru

<sup>3</sup> Department of Inorganic Chemistry, Peoples’ Friendship University of Russia (RUDN University), Moscow 115419, Russia; vnkhrustalev@gmail.com

<sup>4</sup> N.D. Zelinsky Institute of Organic Chemistry of Russian Academy of Sciences, Moscow 119991, Russia

<sup>5</sup> Laboratory of Clinical Biophotonics, Biomedical Science and Technology Park, Sechenov First Moscow State Medical University, Moscow 119991, Russia; gleb.budylin@gmail.com (G.S.B.); eshirshin@gmail.com (E.A.S.)

<sup>6</sup> Faculty of Physics, M.V. Lomonosov Moscow State University, Moscow 119991, Russia

\* Correspondence: nenajdenko@org.chem.msu.ru

## Table of content

|                                     |     |
|-------------------------------------|-----|
| 1. Spectra drawings.....            | S2  |
| 2. X-ray analysis data.....         | S9  |
| 3. DLS cumulative fits.....         | S12 |
| 4. Luminescence titration data..... | S18 |
| 5. Computation data.....            | S19 |

## 1. Spectra drawings

L2.SPA

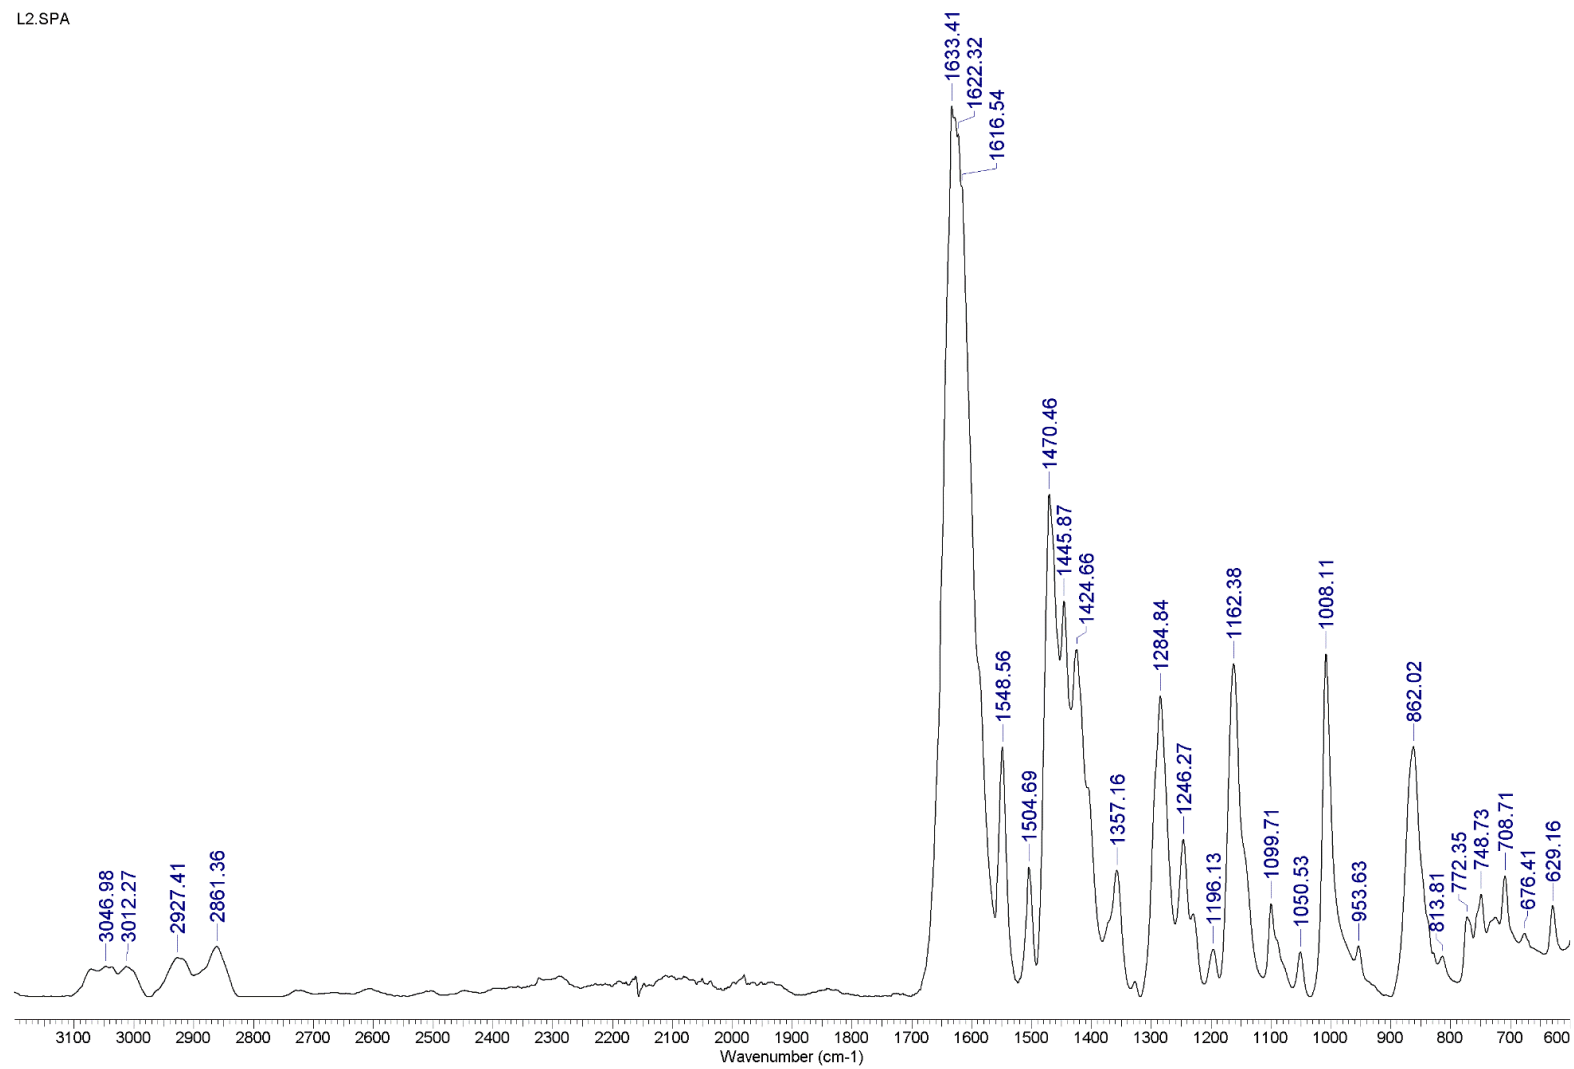

**Figure S1.** Solid-state IR spectrum of macrocycle **L2** at 25°C

L3.SPA

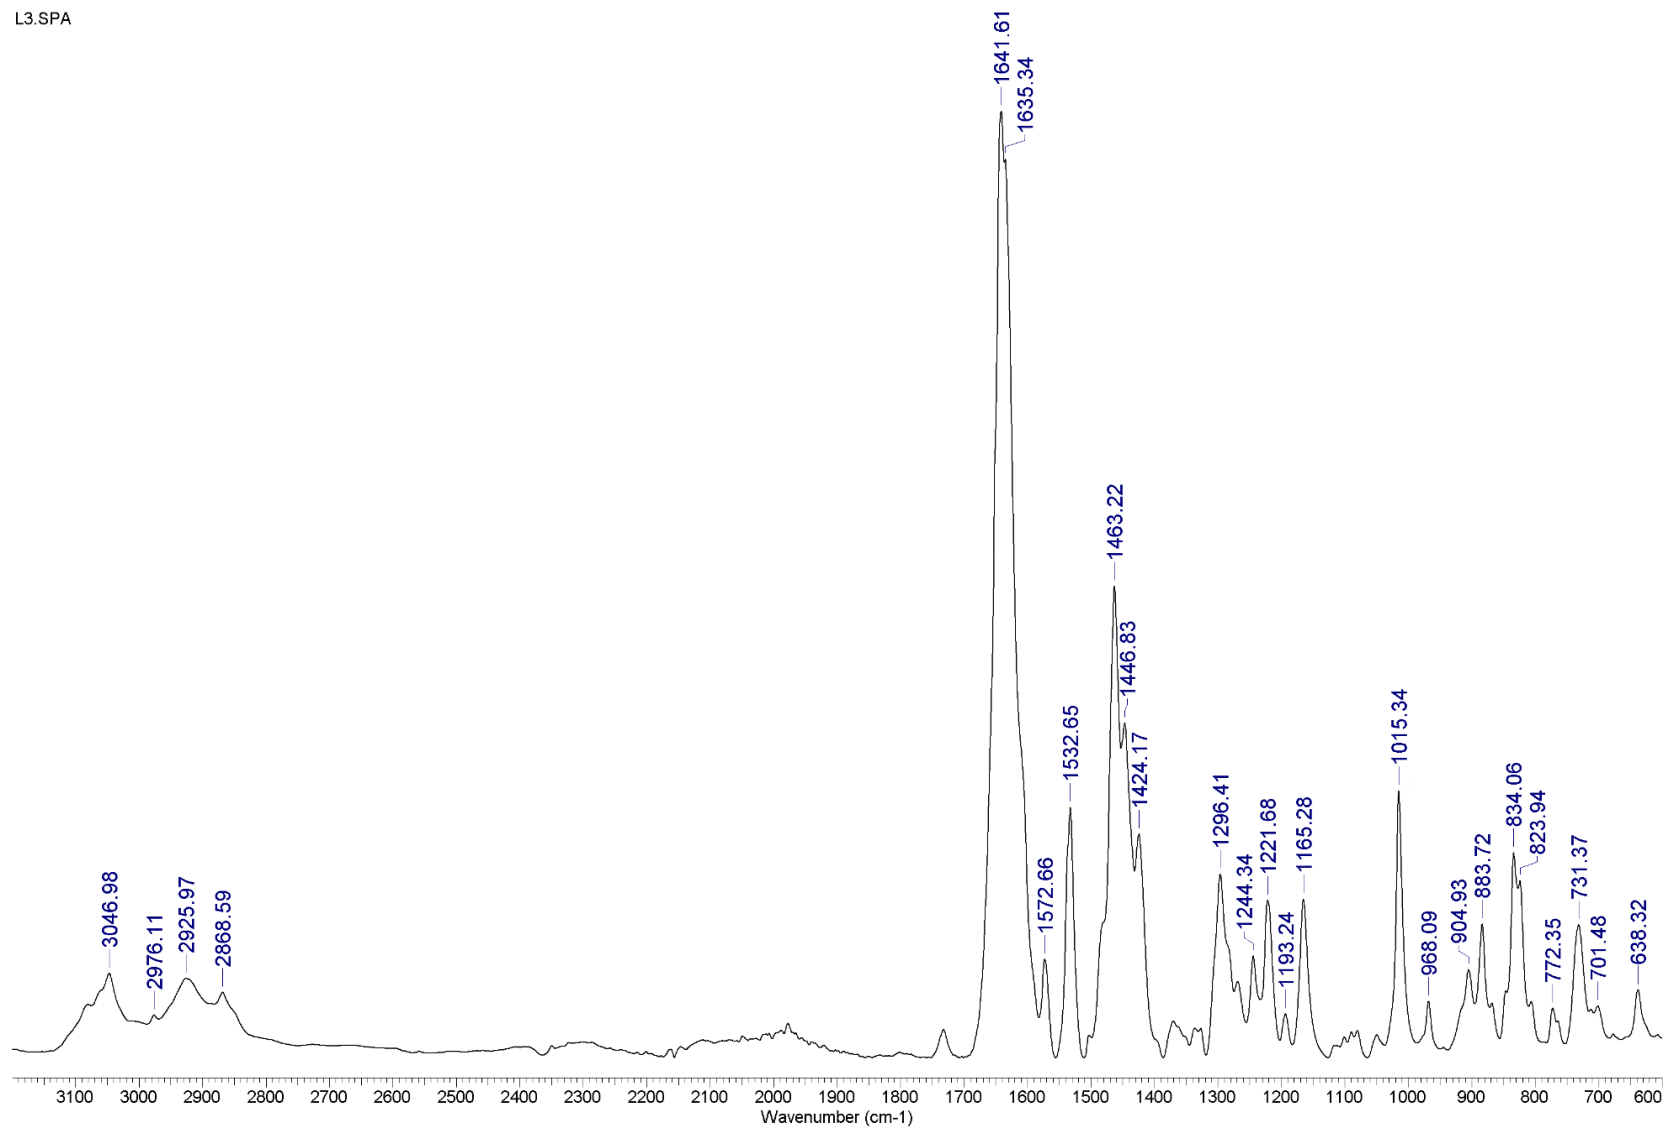

Figure S2. Solid-state IR spectrum of L3 at 25°C

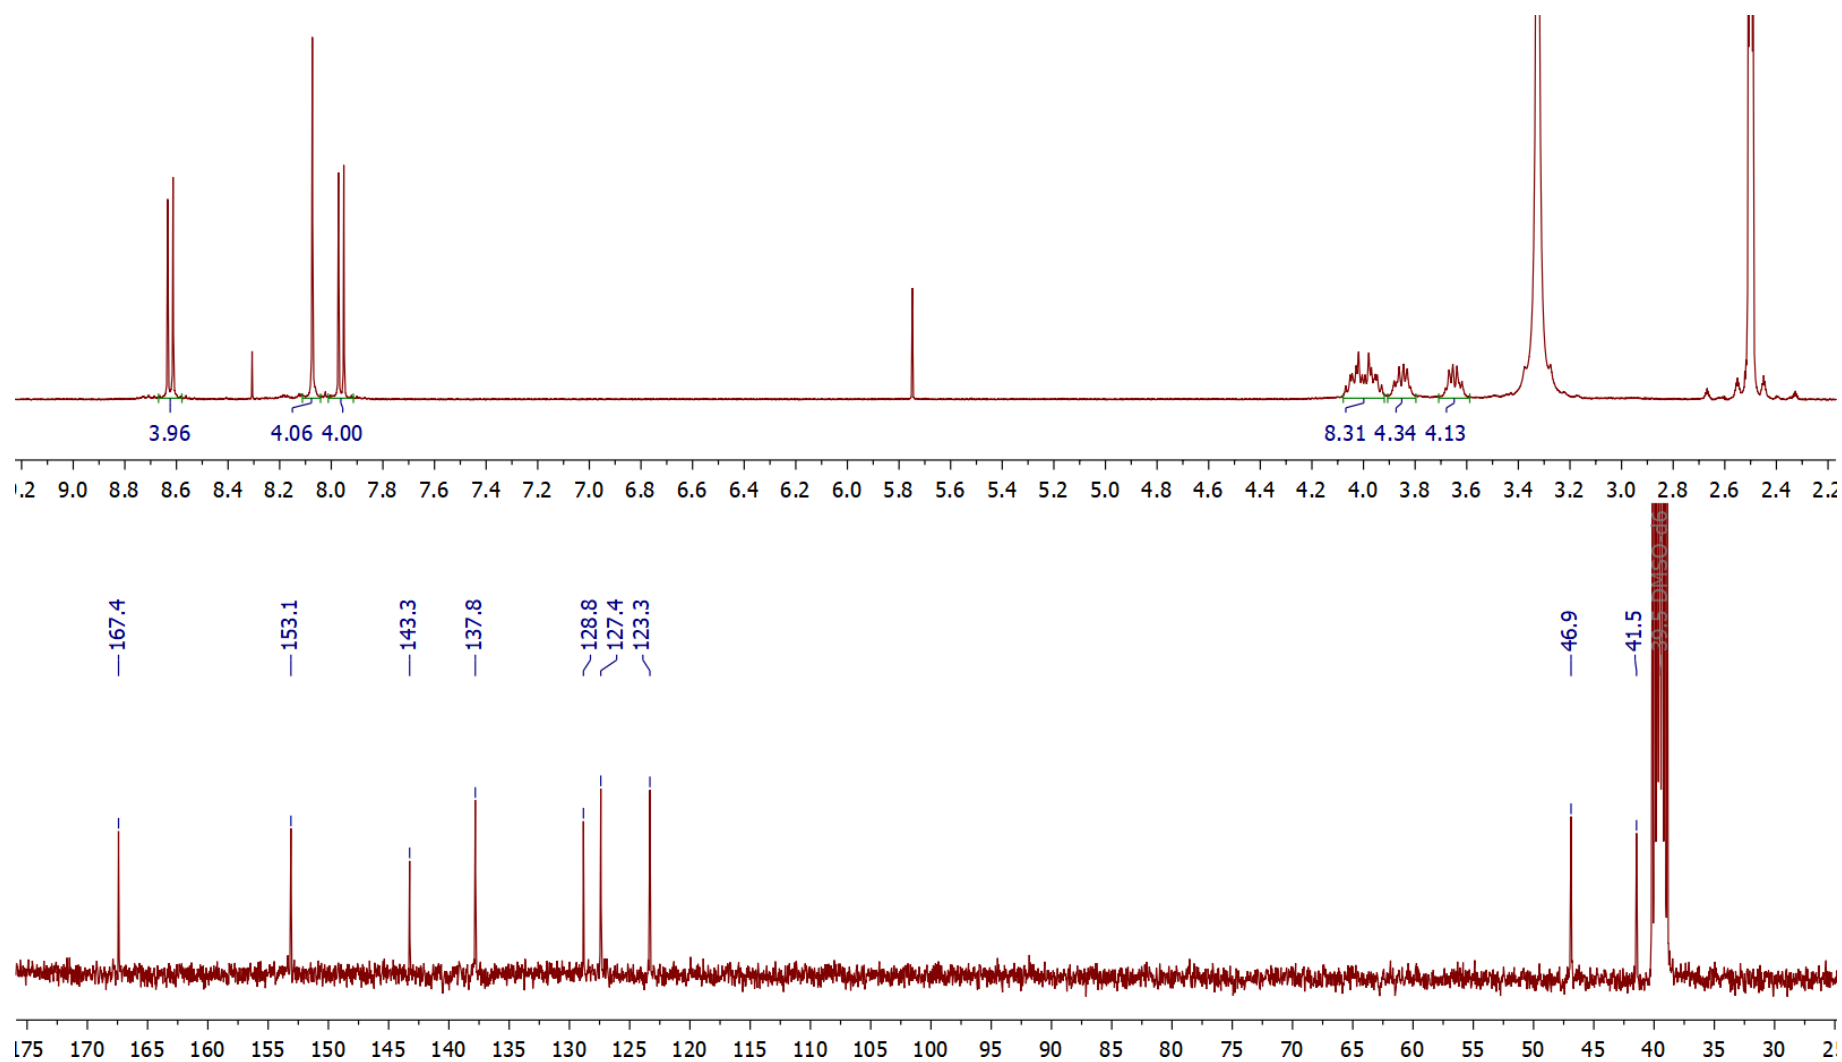

**Figure S3.** <sup>1</sup>H and <sup>13</sup>C NMR spectra of L2 (DMSO-*d*<sub>6</sub>, 25°C).

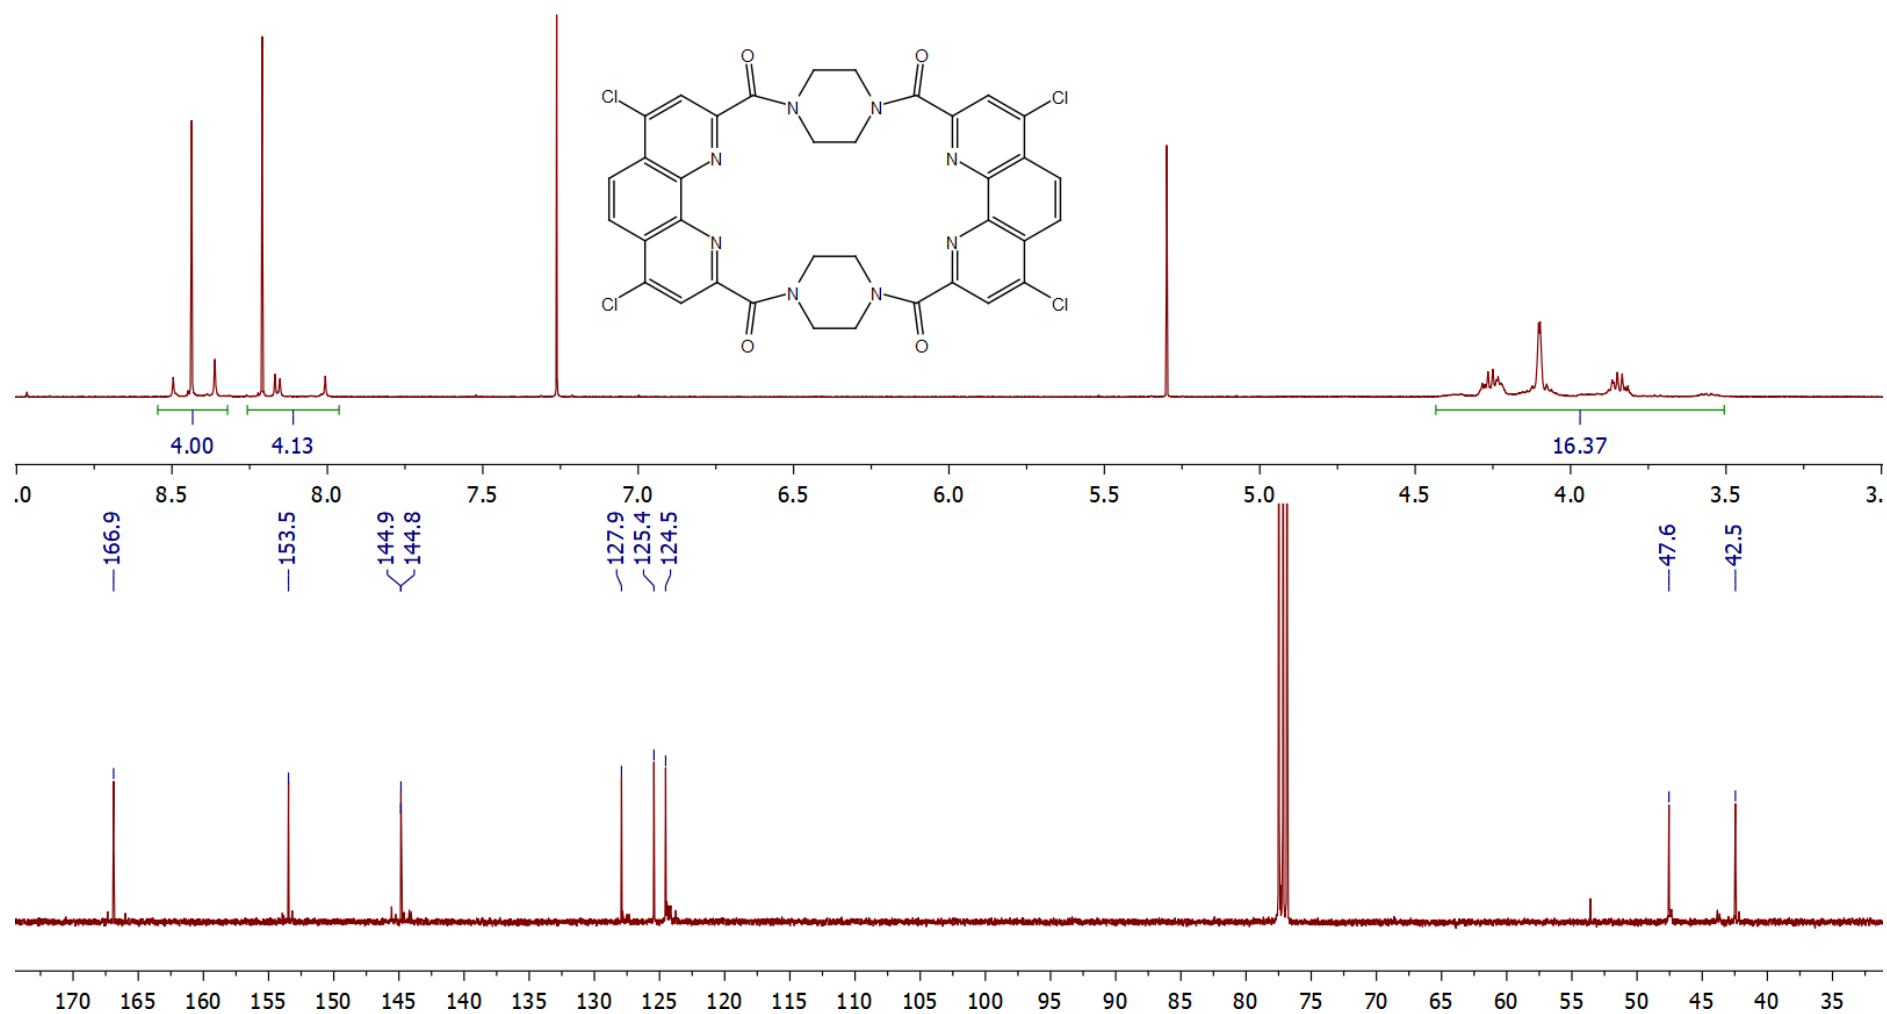

Figure S4.  $^1\text{H}$  and  $^{13}\text{C}$  NMR spectra ( $\text{CDCl}_3$ ,  $25^\circ\text{C}$ )

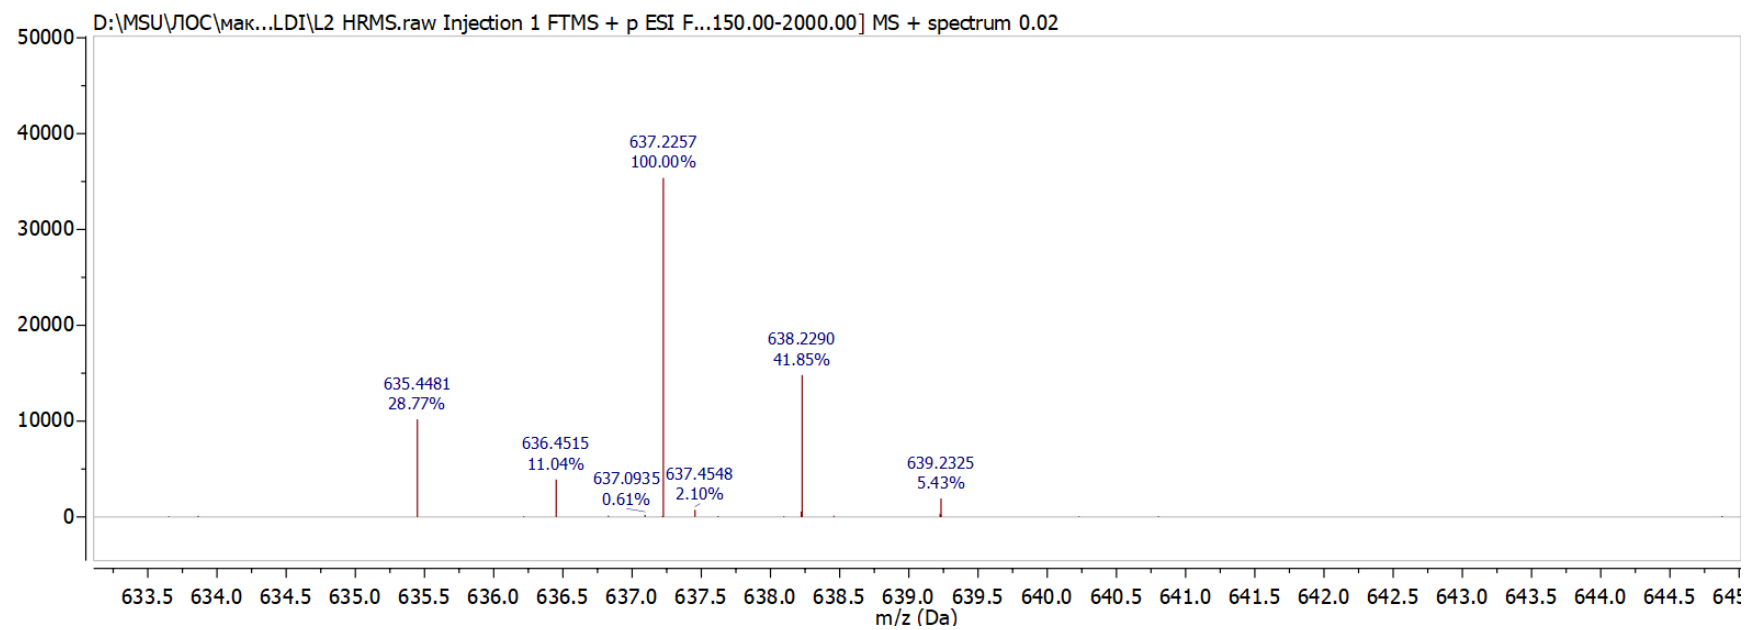

**Figure S5.** Fragmental view of HRMS ESI spectrum of **L2**

## Display Report

### Analysis Info

Analysis Name D:\Data\Kolotyrkina\2020\Muzalevsky\0930038.d  
Method tune\_50-1600.m  
Sample Name /MUSE PVS-076  
Comment C36H24Cl4N8O4 mH 773.0747 calibrant added, CH3CN

Acquisition Date 30.09.2020 18:55:47

Operator BDAL@DE  
Instrument / Ser# micrOTOF 10248

### Acquisition Parameter

|             |            |                      |          |                  |           |
|-------------|------------|----------------------|----------|------------------|-----------|
| Source Type | ESI        | Ion Polarity         | Positive | Set Nebulizer    | 1.0 Bar   |
| Focus       | Not active |                      |          | Set Dry Heater   | 200 °C    |
| Scan Begin  | 50 m/z     | Set Capillary        | 4500 V   | Set Dry Gas      | 4.0 l/min |
| Scan End    | 1600 m/z   | Set End Plate Offset | -500 V   | Set Divert Valve | Waste     |

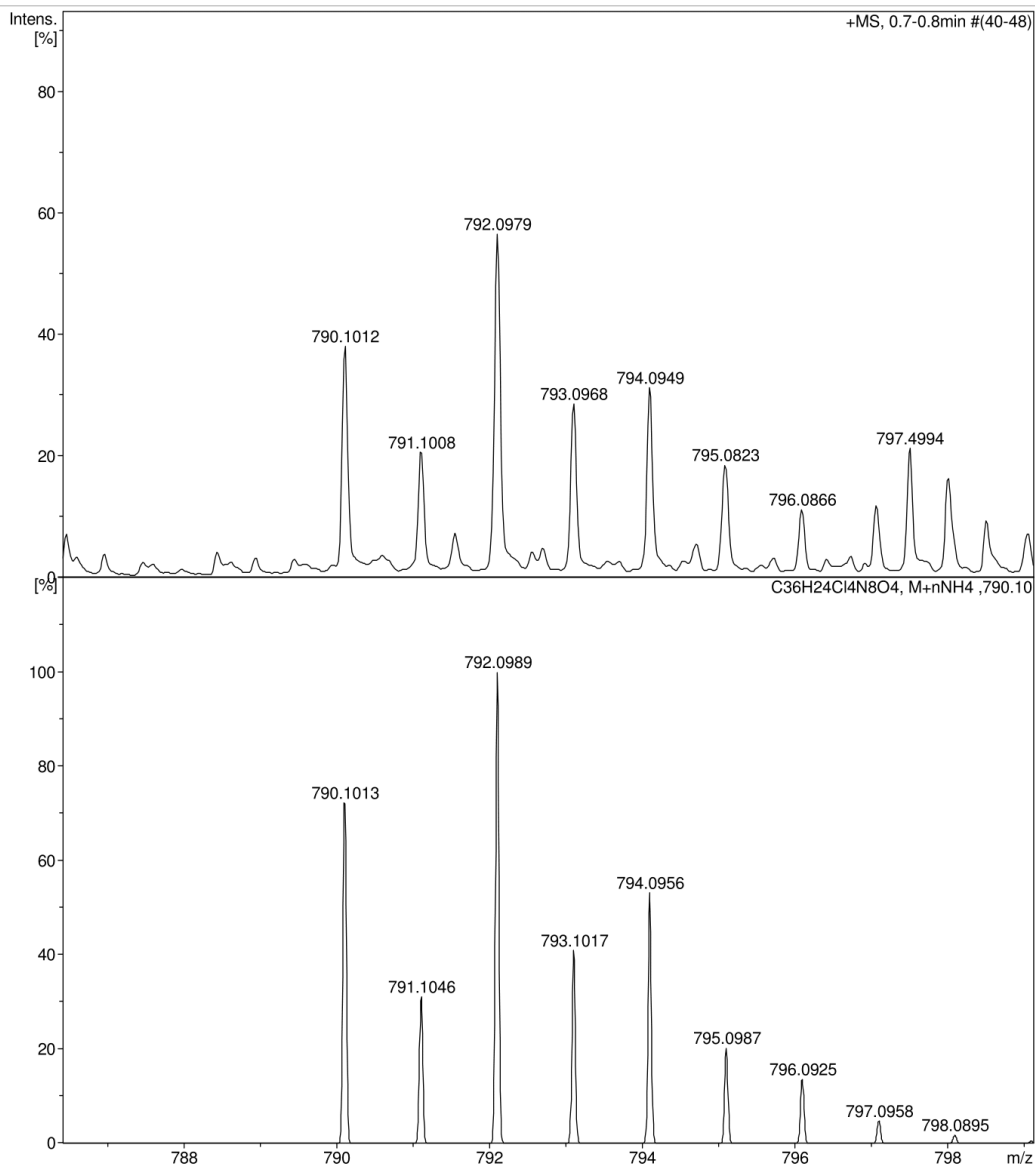

**Figure S6.** Fragmental view of HRMS ESI spectrum of **L3**

Comment 1 PVS-076

Comment 2 DCTB -

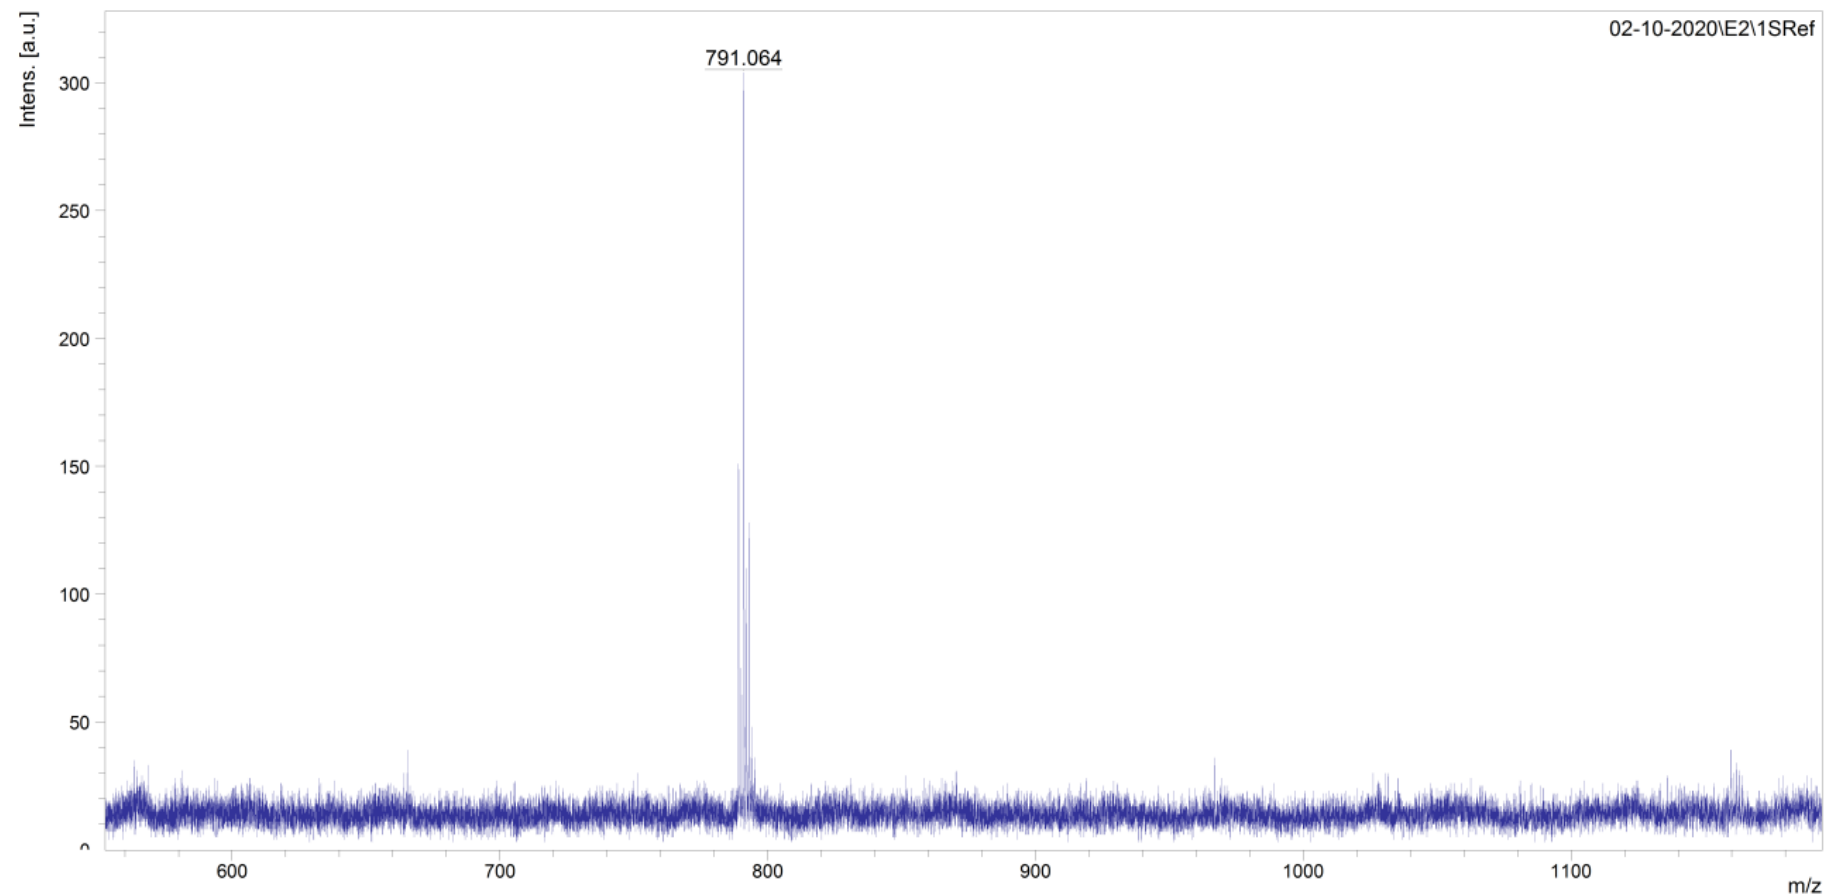

**Figure S7.** MALDI spectrum of macrocycle **L3**.



## 2. X-ray analysis data

**Table S1.** Crystal data and structure refinement details for **L2**·2.75DMF, **L3**·2CHCl<sub>3</sub> and **L3**·3DMF.

|                                         | <b>L2</b> ·2.75DMF | <b>L3</b> ·2CHCl <sub>3</sub> | <b>L3</b> ·3DMF |
|-----------------------------------------|--------------------|-------------------------------|-----------------|
| a, Å                                    | 10.9660(11)        | 13.3836(3)                    | 21.7930(10)     |
| b, Å                                    | 14.2860(14)        | 14.7558(4)                    | 13.8810(10)     |
| c, Å                                    | 15.1070(15)        | 22.1736(5)                    | 15.4230(10)     |
| $\alpha$ , °                            | 69.625(10)         | 90.0                          | 90.0            |
| $\beta$ , °                             | 79.528(11)         | 105.844(3)                    | 90.0            |
| $\gamma$ , °                            | 69.554(10)         | 90.0                          | 90.0            |
| V, Å <sup>3</sup>                       | 2074.0(4)          | 4212.61(19)                   | 4665.6(5)       |
| Z                                       | 2                  | 4                             | 4               |
| Sp. gr.                                 | P-1                | P2 <sub>1</sub> /c            | Pbcn            |
| $\lambda$ , Å                           | 0.75270            | 1.54186                       | 0.71073         |
| T, K                                    | 100                | 295                           | 295             |
| $\Theta_{\max}$ , °                     | 30.981             | 67.686                        | 25.995          |
| N <sub>measured</sub>                   | 30844              | 32127                         | 58030           |
| N <sub>averaged</sub> /N(I>2 $\sigma$ ) | 10892 / 7534       | 7363 / 3592                   | 4580 / 2064     |
| R <sub>int</sub>                        | 0.0479             | 0.0813                        | 0.1352          |
| R (I>2 $\sigma$ )                       | 0.0580             | 0.0476                        | 0.0866          |
| wR <sup>2</sup> (all)                   | 0.1634             | 0.1262                        | 0.1581          |
| GoF                                     | 1.052              | 0.830                         | 1.002           |
| $\Delta\rho$ , e Å <sup>-3</sup>        | 0.596/-0.594       | 0.445/-0.248                  | 0.238/-0.201    |
| CCDC number                             | 2247968            | 2170206                       | 2247971         |

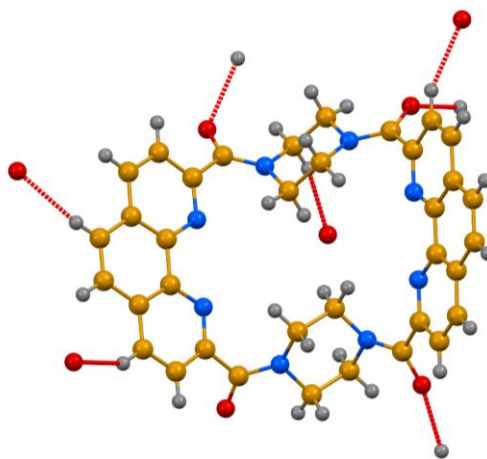

**Figure S8.** The C-H...O hydrogen bonds formed by **L2** molecule in **L2**·2.75DMF

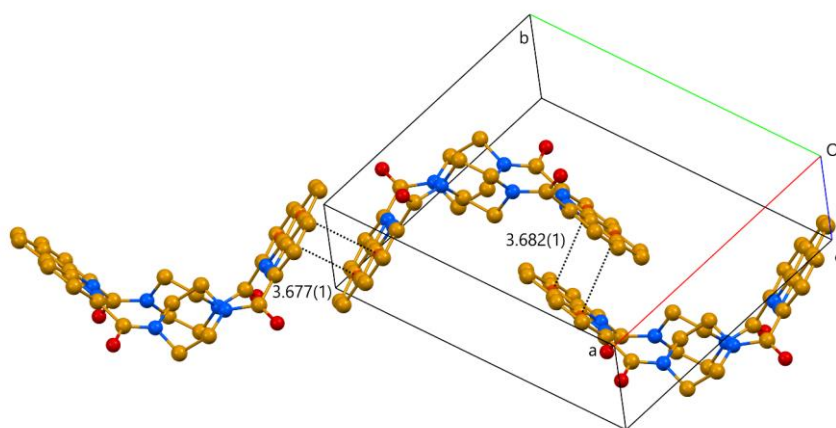

**Figure S9.** Stacking interactions in **L2·2.75DMF**.

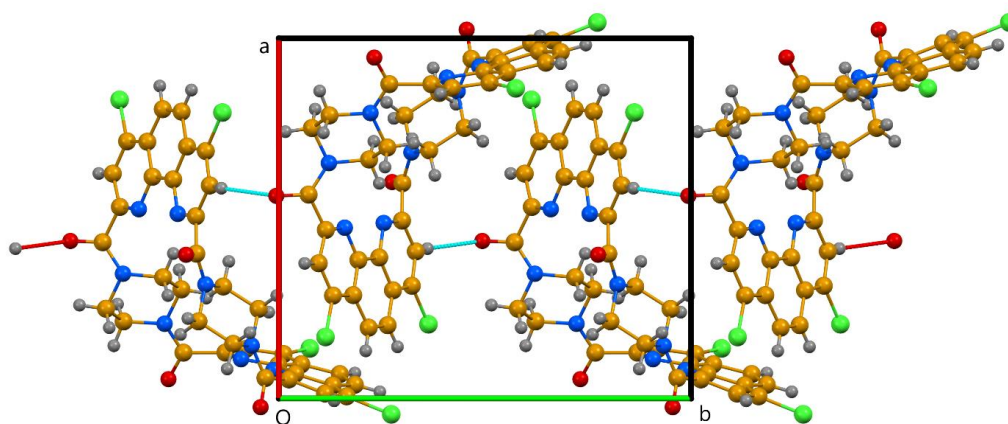

**Figure S10.** Chains of hydrogen-bonded **L3** molecules in **L3·2CHCl<sub>3</sub>**.

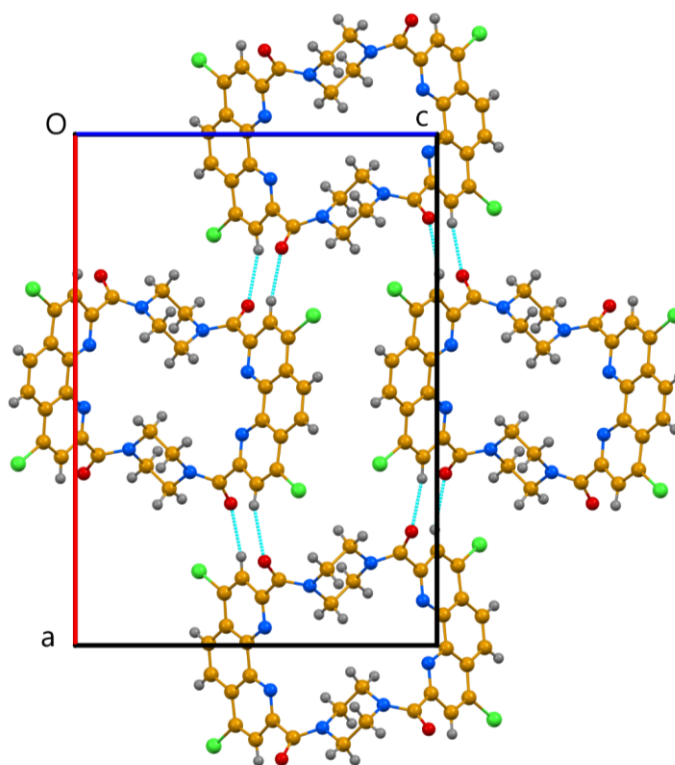

**Figure S11.** Layers of hydrogen-bonded **L3** molecules in **L3·3DMF**.

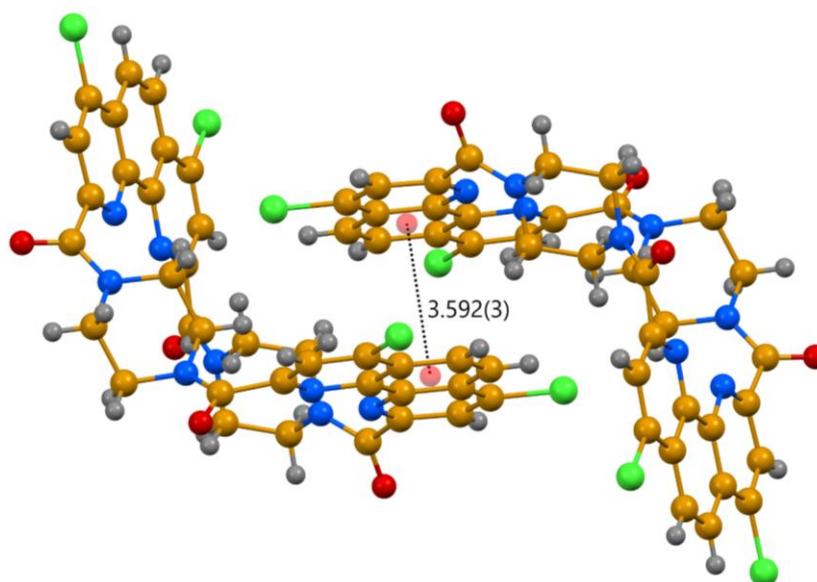

**Figure S12.** Stacking dimers in **L3·3DMF**.

**Table S2.** Non-classic C-H...O hydrogen bonds in the structures **L2·2.75DMF**, **L3·2CHCl<sub>3</sub>** and **L3·3DMF**.

| C-H...O contact, symmetry operation | C-H, Å | H...O, Å | C...O, Å | ∠ C-H...O, ° |
|-------------------------------------|--------|----------|----------|--------------|
| <b>L2·2.75DMF</b>                   |        |          |          |              |
| C15-H15B...O1A(1-x,2-y,1-z)         | 0.99   | 2.24     | 3.180(2) | 159          |
| C8A-H8A...O1(1-x,2-y,1-z)           | 0.95   | 2.41     | 3.281(2) | 153          |
| C7-H7...O2A(x,-1+y,z)               | 0.95   | 2.41     | 3.267(3) | 150          |
| <b>L3·2CHCl<sub>3</sub></b>         |        |          |          |              |
| C3-H3..O2(1-x,1/2+y,3/2-z)          | 0.93   | 2.34     | 3.172(5) | 149          |
| <b>L3·3DMF</b>                      |        |          |          |              |
| C3-H3..O2(-1/2+x,1/2-y,1-z)         | 0.93   | 2.29     | 3.204(6) | 167          |
| C8-H8..O1(1/2+x,1/2-y,1-z)          | 0.93   | 2.42     | 3.310(6) | 162          |

### 3. DLS cumulative fits

Figure captions indicate conditions: solvent, ultrasonic treatment, presence of pentafluorobenzoic acid, recrystallisation from ethanol

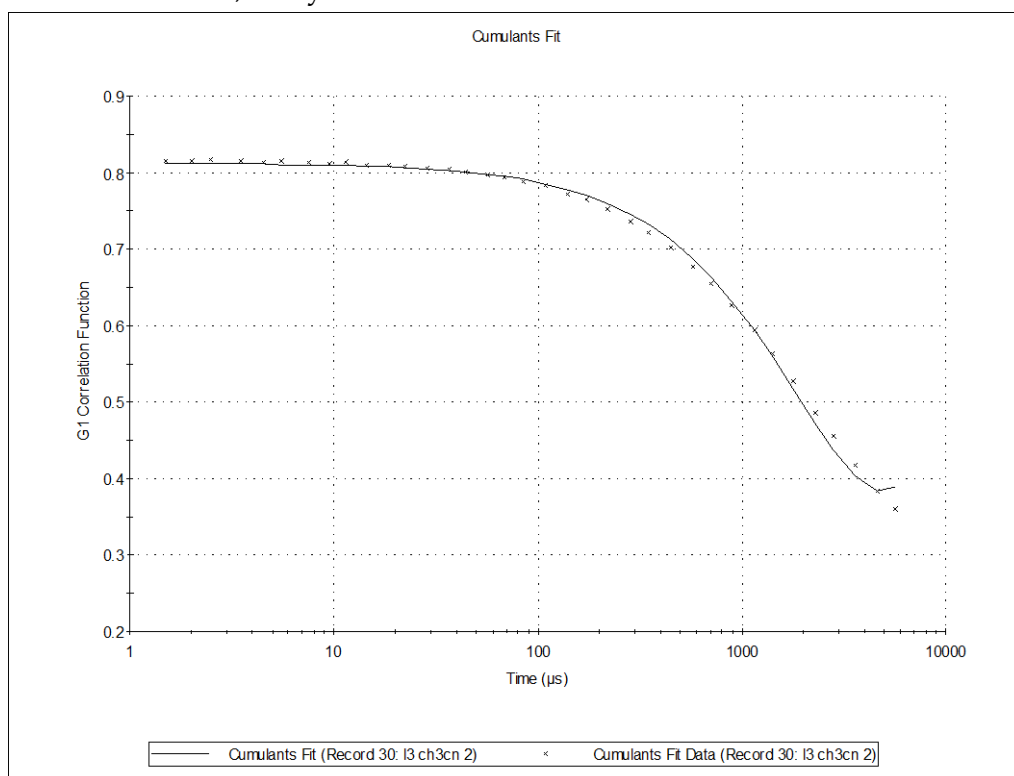

**Figure S13. Acetonitrile**

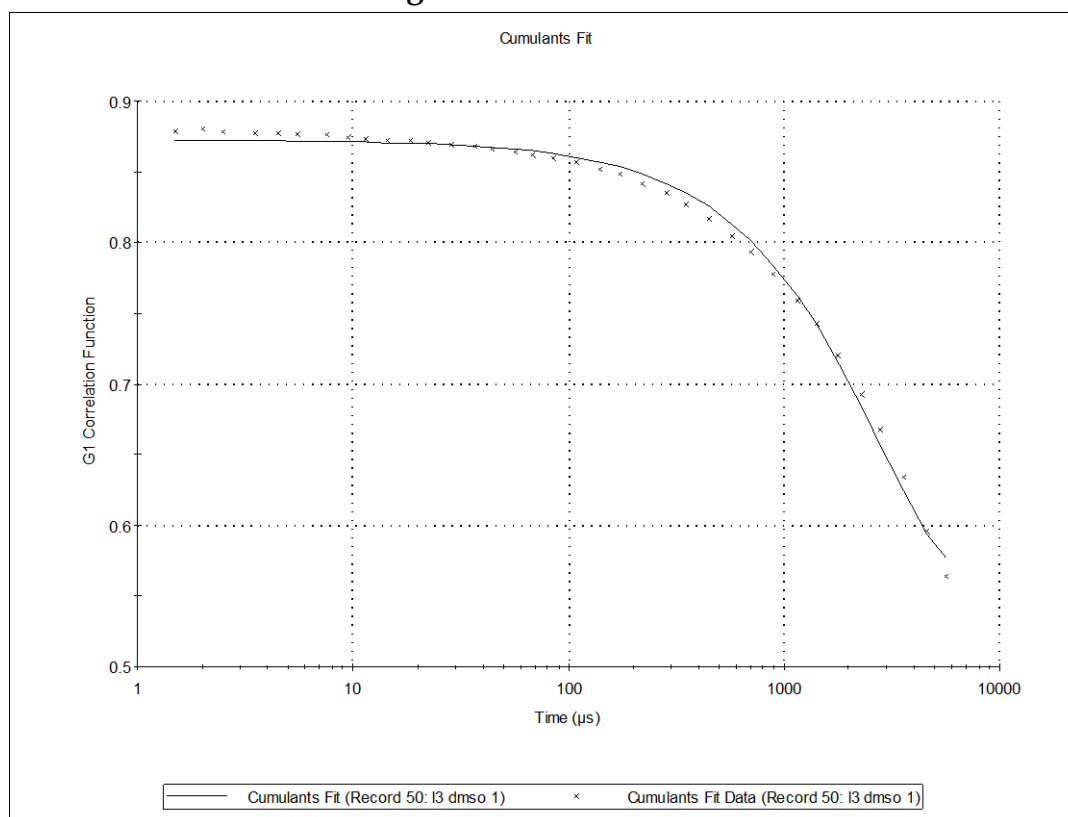

**Figure S14. Chloroform**

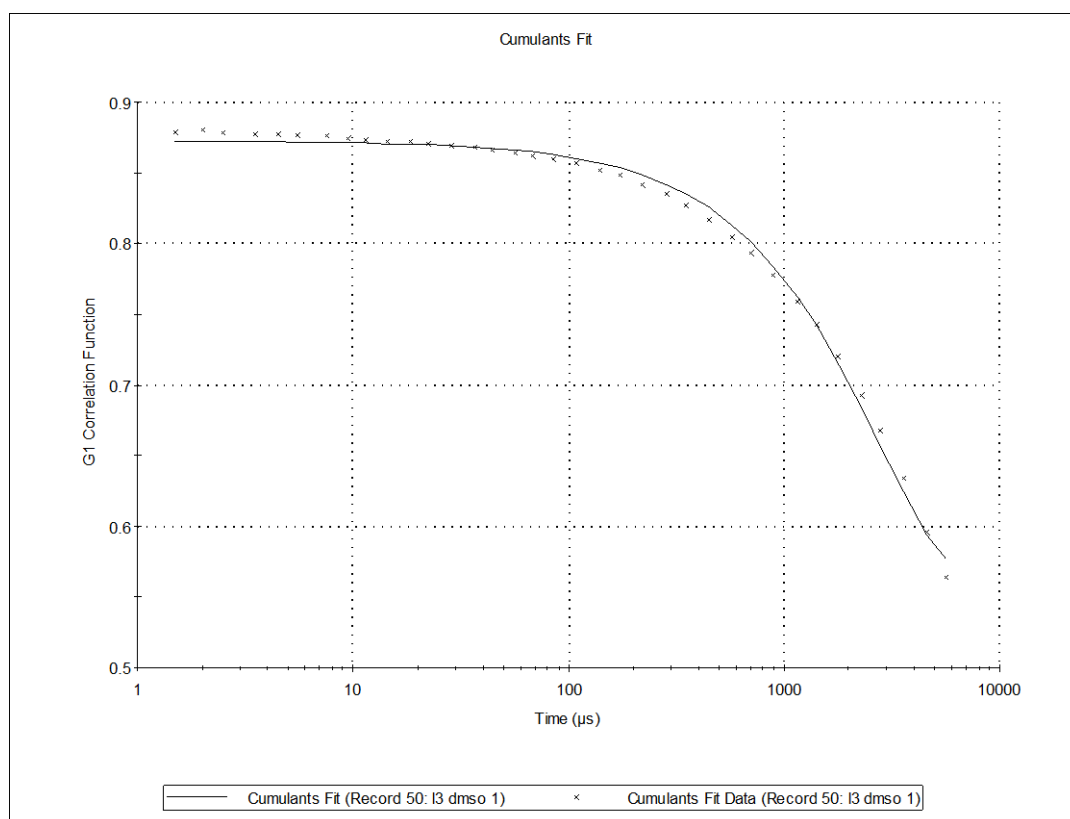

**Figure S15. DMSO**

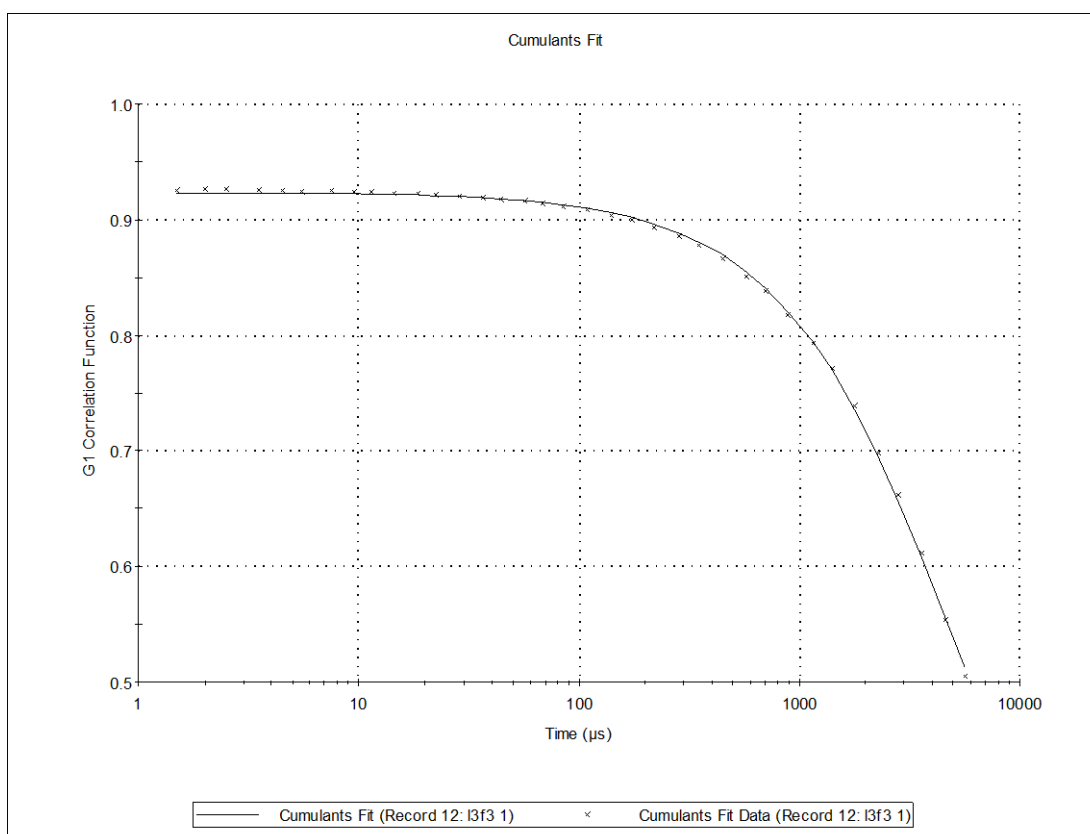

**Figure S16. F-3**

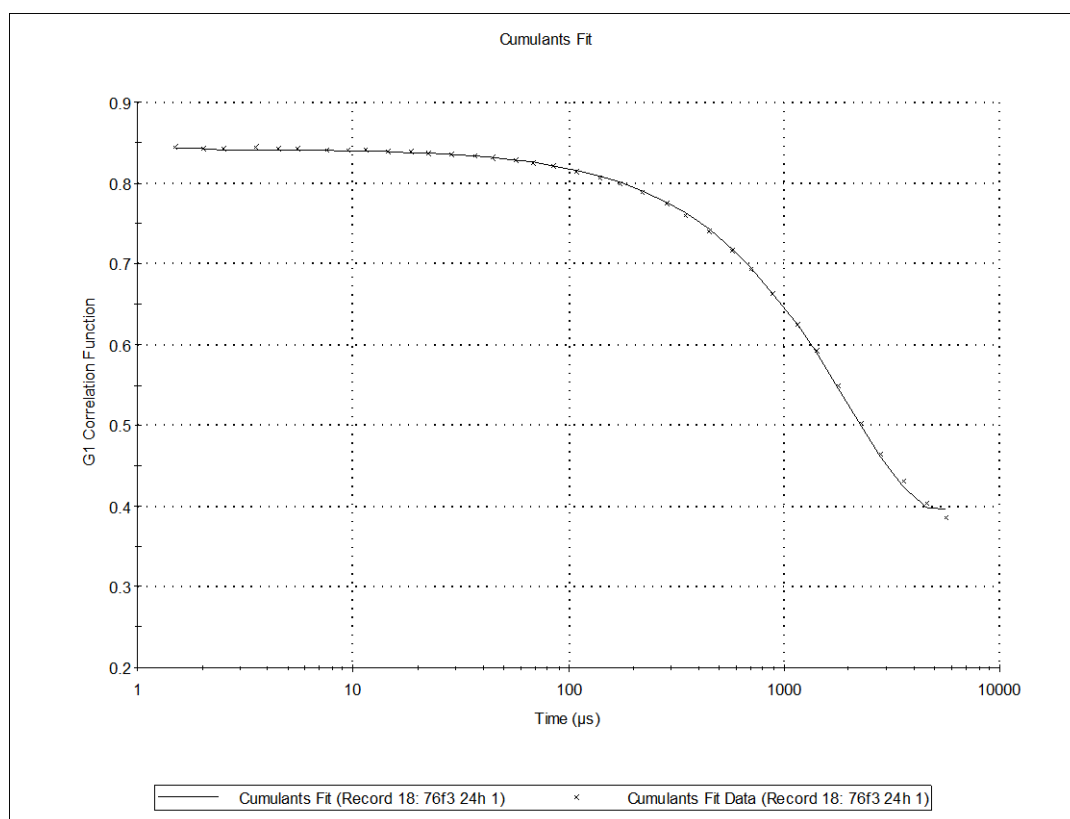

**Figure S17.** F-3, recrystallisation from ethanol

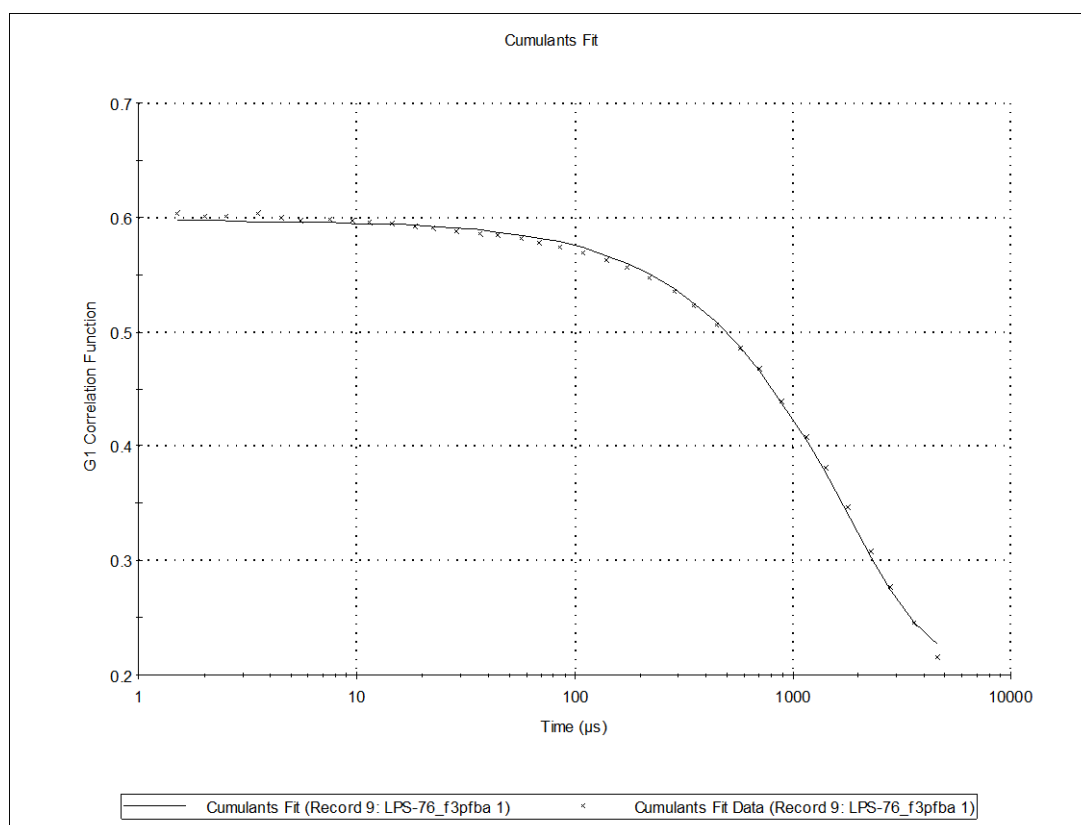

**Figure S18.** F-3, pentafluorobenzoic acid

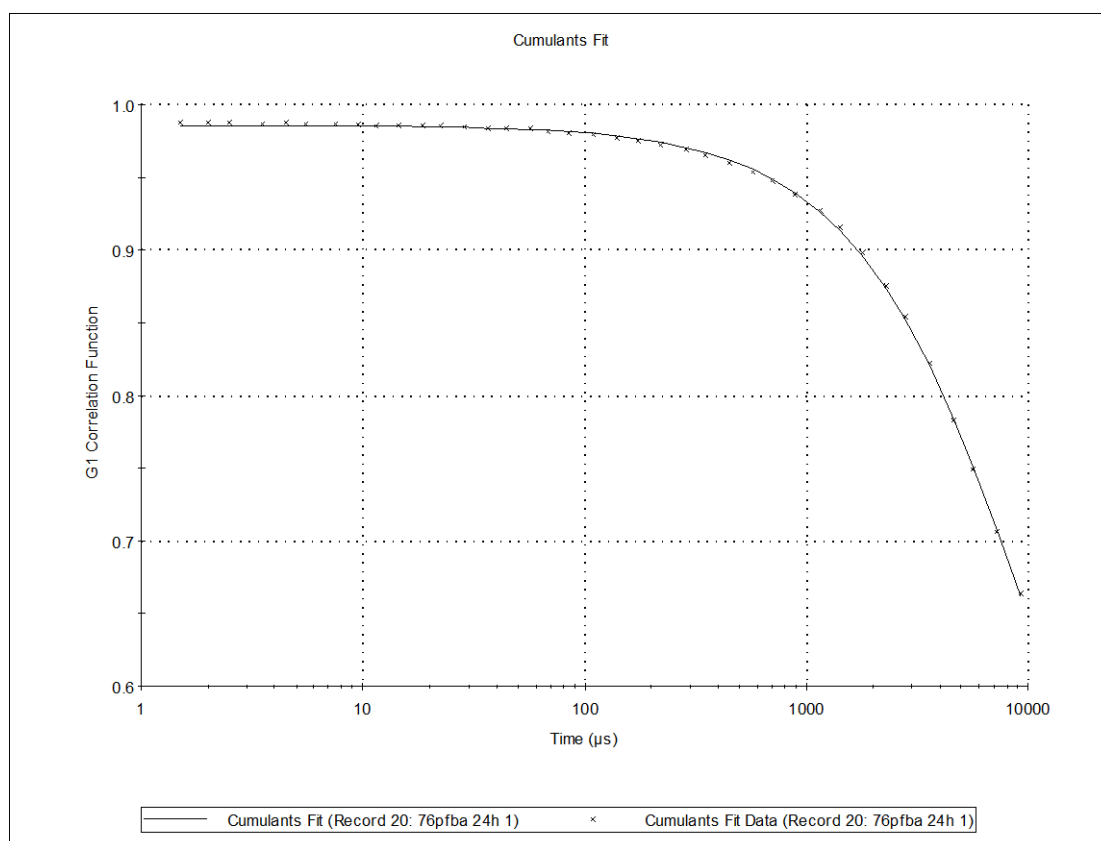

**Figure S19.** F-3, pentafluorobenzoic acid, recrystallisation from ethanol

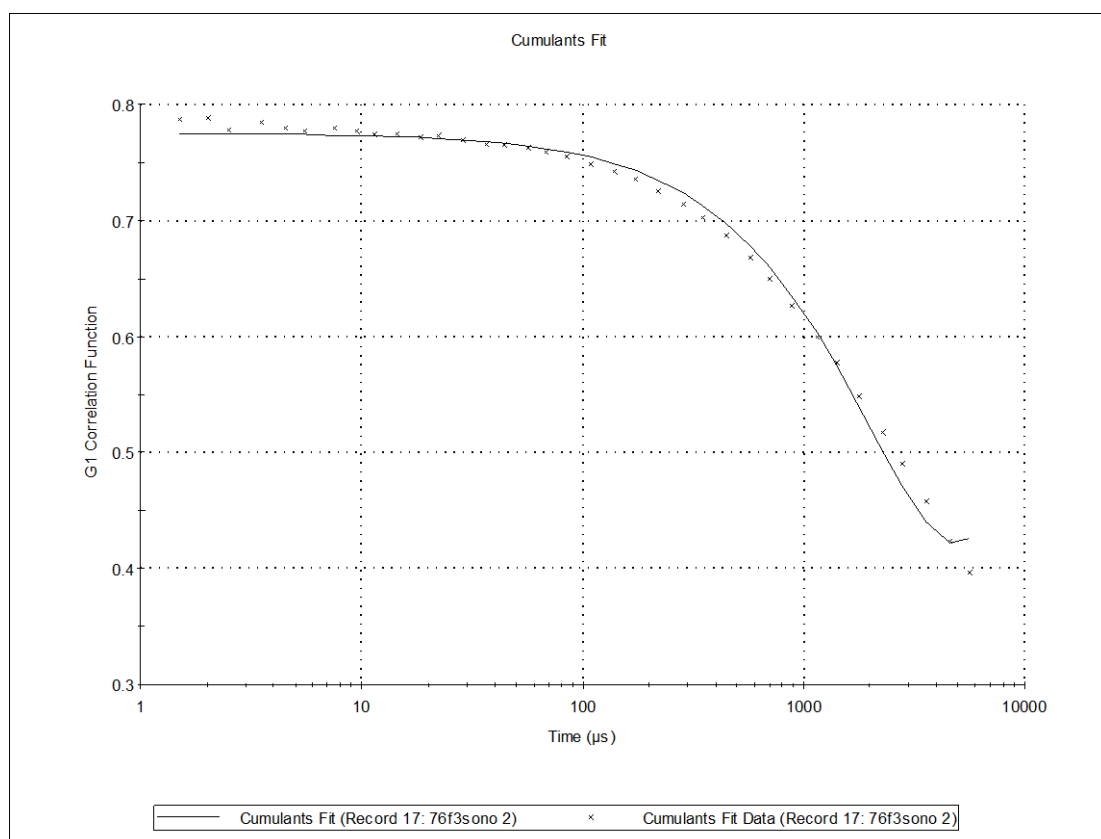

**Figure S20.** F-3, ultrasonic

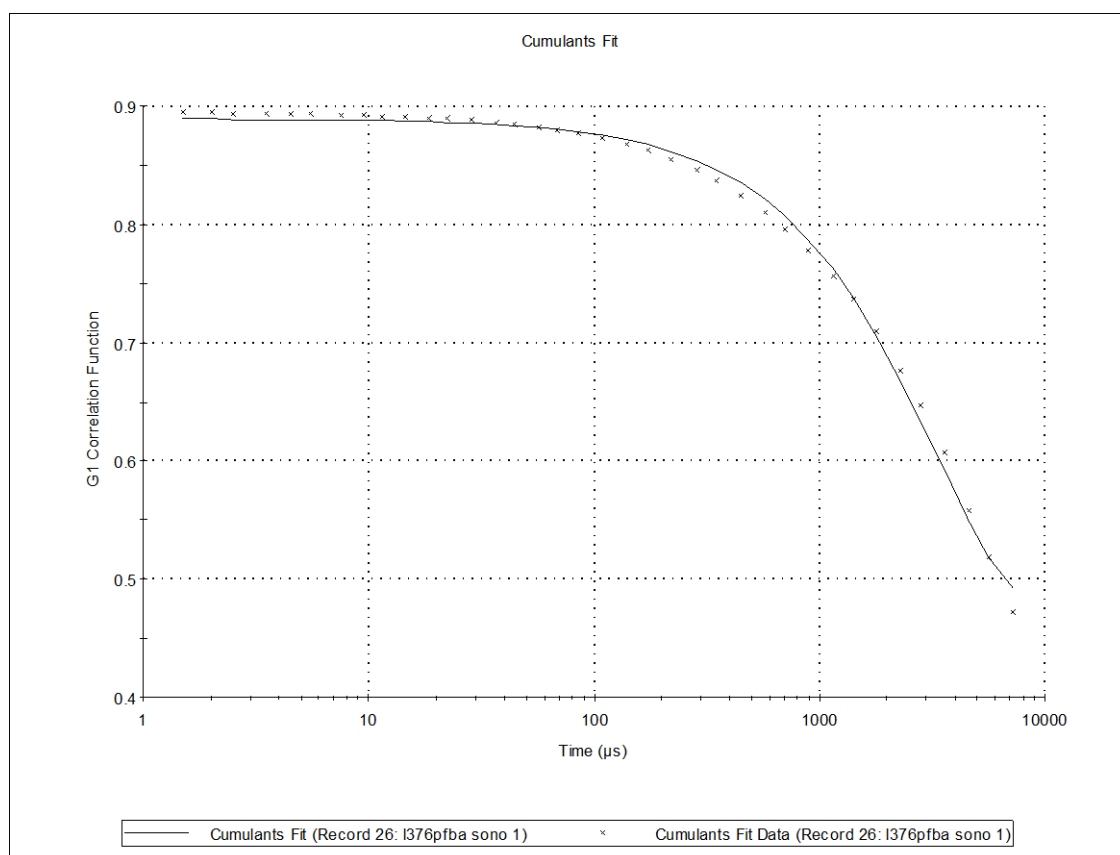

**Figure S21.** F-3, pentafluorobenzoic acid, ultrasonic

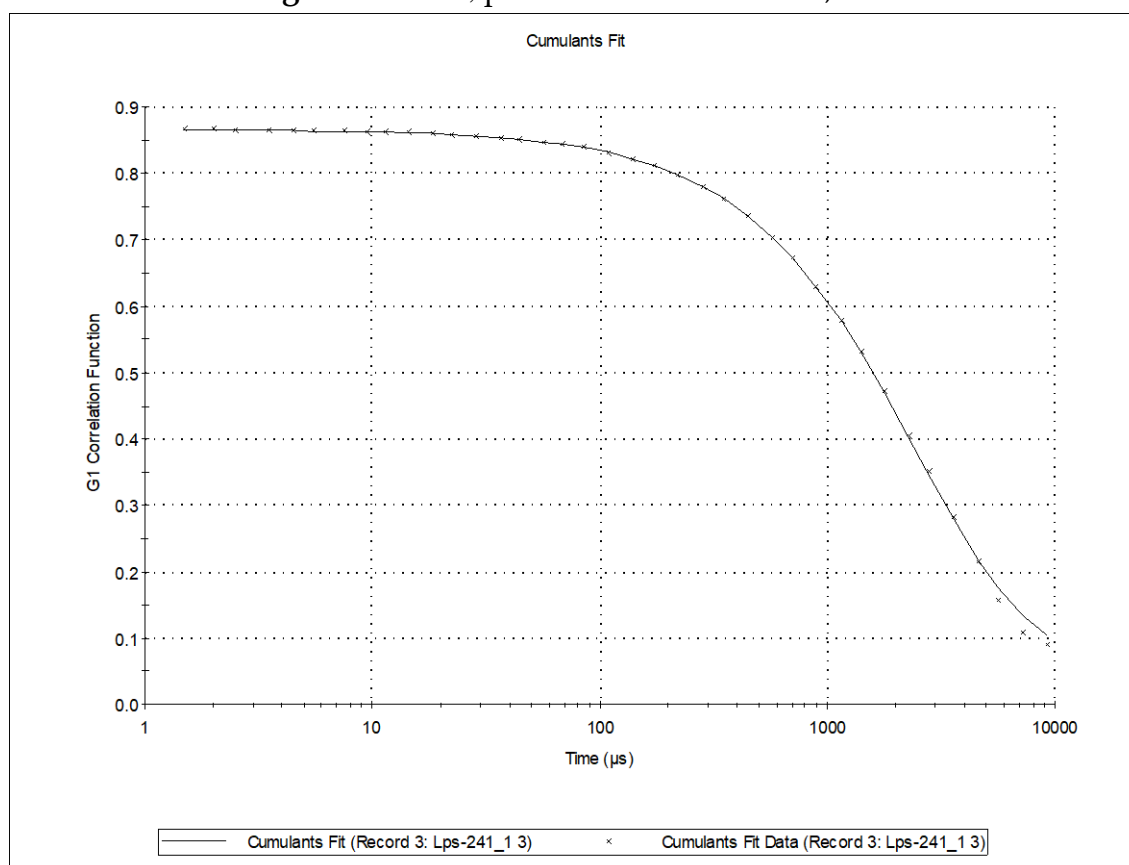

**Figure S22.** F-3, recrystallization from ethanol



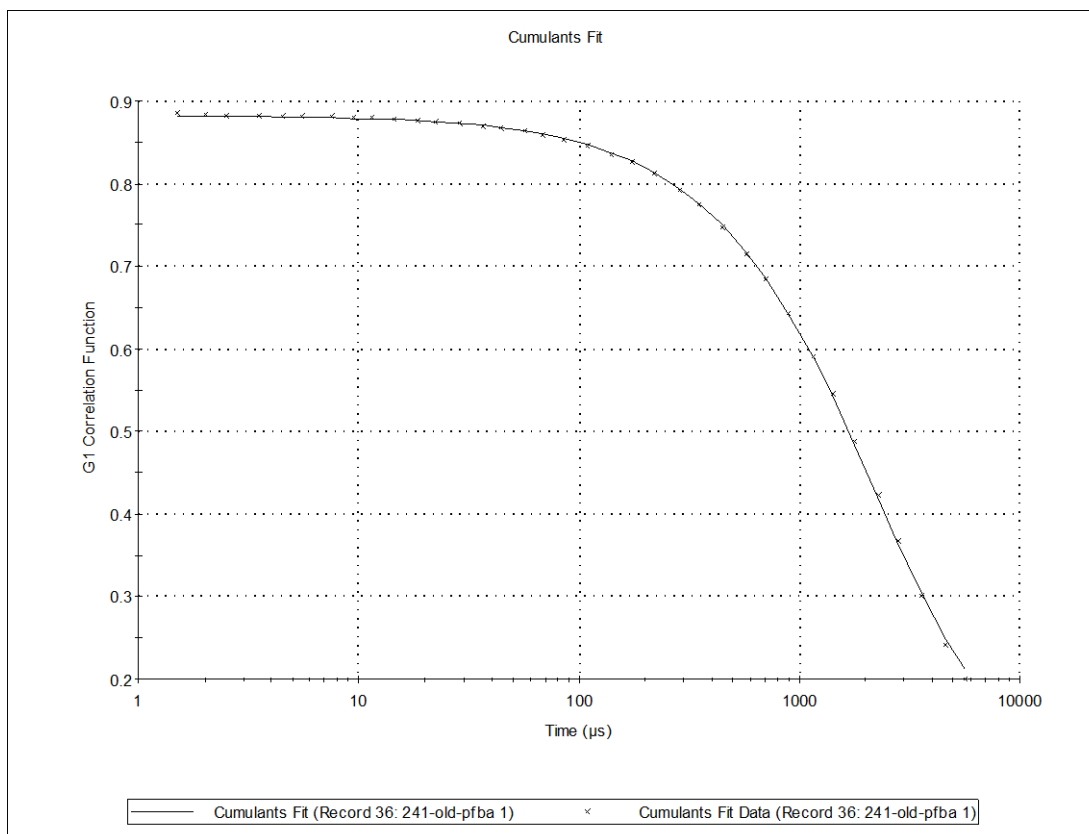

**Figure S23.** F-3, recrystallization from ethanol, ultrasonic

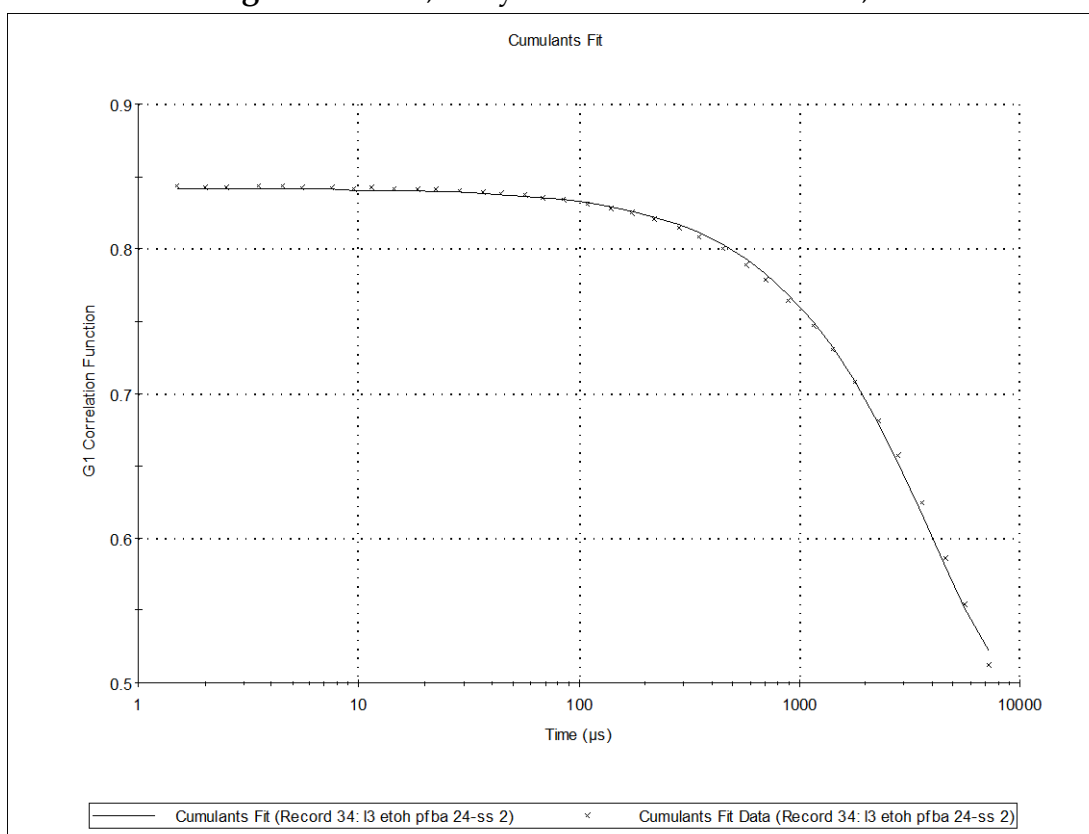

**Figure S24.** F-3, pentafluorobenzoic acid, recrystallization from ethanol

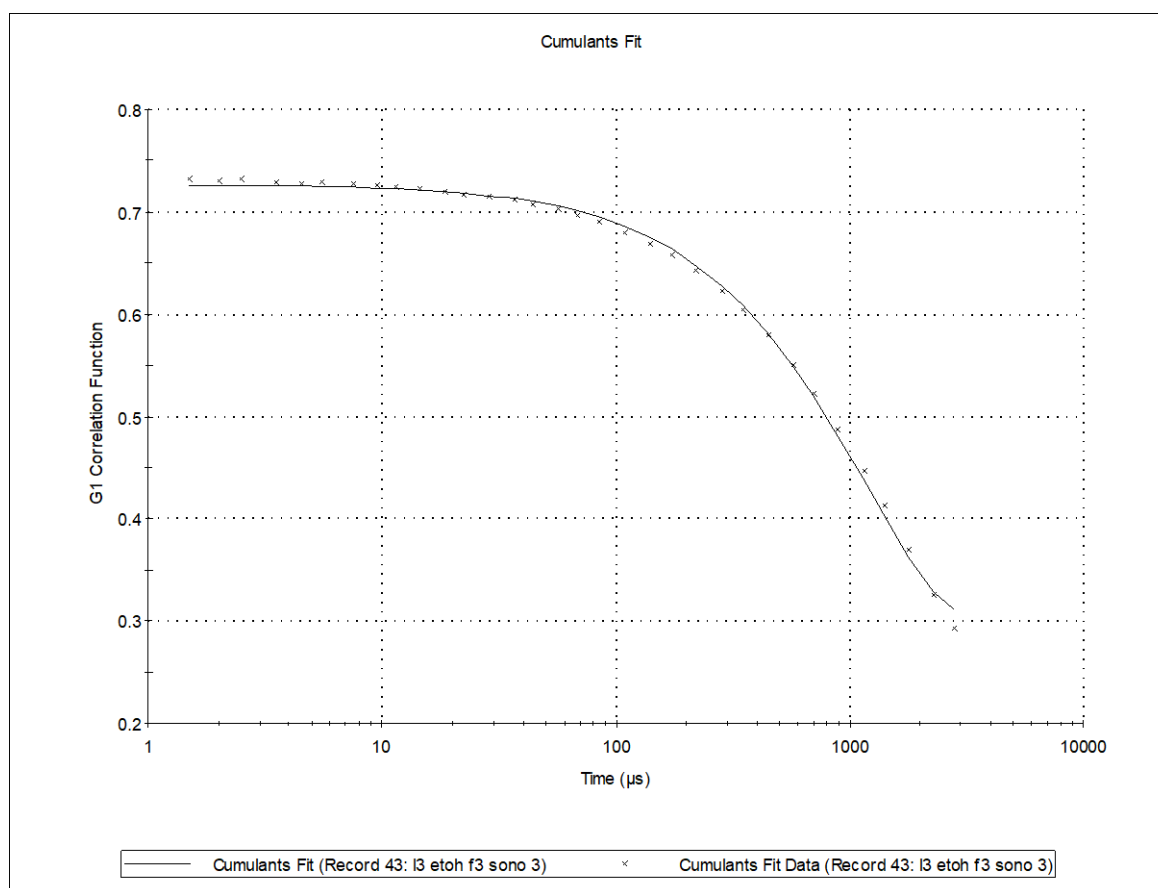

Figure S25. F-3, pentafluorobenzoic acid, recrystallization from ethanol, ultrasonic

#### 4. Luminescence titration data

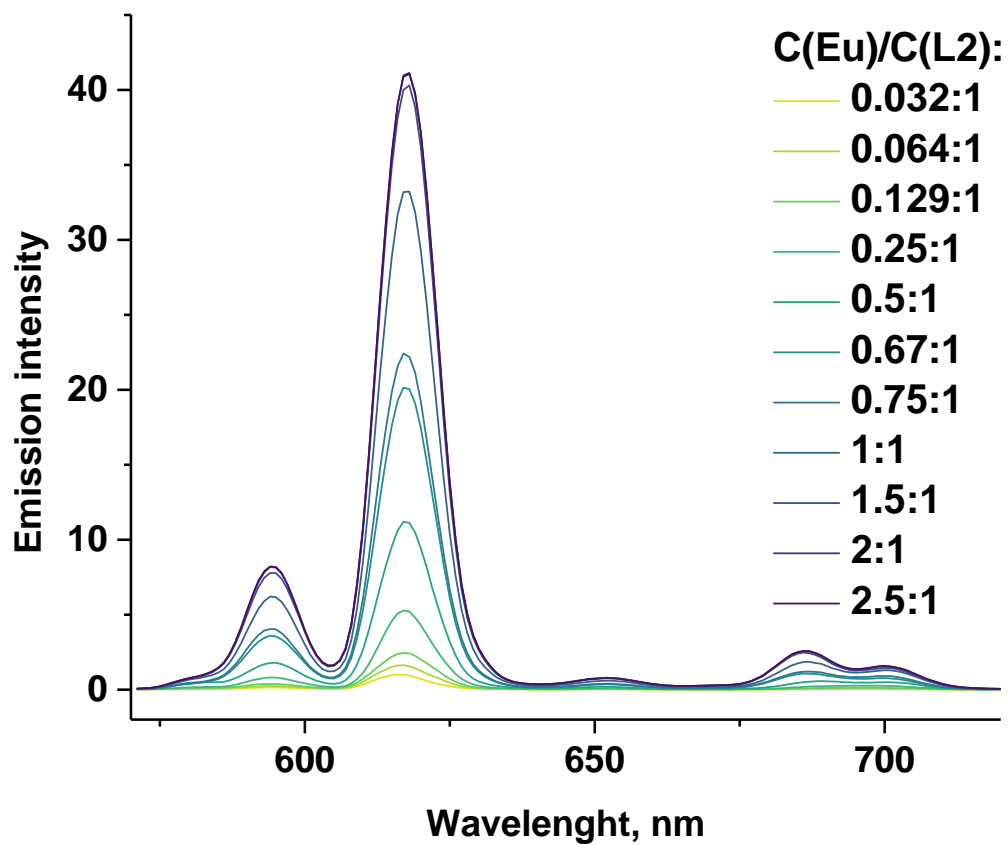

Figure S26. General view of the fluorescence spectra of europium complexes when excited at 300 nm.

## 5. Computation data

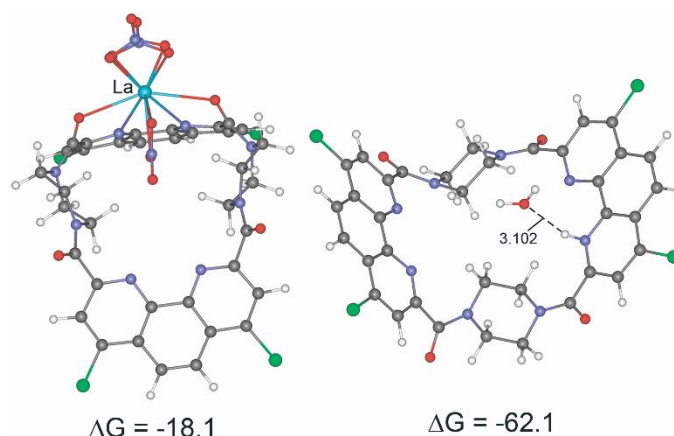

### Coordinates

Conformer\_1-Cl\_LaNO3\_AP

cartesian

set=L1

|    |             |             |             |
|----|-------------|-------------|-------------|
| 17 | 1.84090656  | 6.72923572  | 1.36560863  |
| 17 | 2.86119480  | 3.46323637  | -5.50946429 |
| 17 | -6.68276201 | -2.74045058 | -3.86991601 |
| 17 | -7.64962789 | 0.39065916  | 2.93675765  |
| 8  | -1.82727033 | -4.86954266 | -2.38835182 |
| 8  | -2.82632664 | -1.53853669 | 4.73600005  |
| 7  | 2.39577100  | 2.28770105  | 0.72221924  |
| 7  | 2.76756317  | 1.18280295  | -1.60733002 |
| 7  | -3.22900888 | -2.22176042 | -0.94943616 |
| 7  | -3.57796943 | -1.07408895 | 1.52113537  |
| 7  | 1.73940045  | -1.66689967 | -3.24760212 |
| 7  | -0.63282632 | -2.91336030 | -2.30991599 |
| 7  | 0.73022274  | 1.59250943  | 3.64995946  |
| 7  | -1.45019122 | -0.21414062 | 3.46620898  |
| 6  | 2.02212486  | 5.02098584  | 1.08763357  |
| 6  | 1.81700181  | 4.13568272  | 2.13557283  |
| 1  | 1.53057518  | 4.49960797  | 3.12359471  |
| 6  | 2.00627505  | 2.75857252  | 1.89595083  |
| 6  | 2.50927408  | 3.13691945  | -0.31201808 |
| 6  | 2.71000766  | 2.52499609  | -1.60286964 |
| 6  | 2.70891349  | 0.54394428  | -2.76562511 |
| 6  | 2.72803932  | 1.21946559  | -4.00341884 |

|   |             |             |             |
|---|-------------|-------------|-------------|
| 1 | 2.71794899  | 0.66701661  | -4.94434129 |
| 6 | 2.78029897  | 2.60586282  | -3.99762939 |
| 6 | 2.72605464  | 3.32616704  | -2.77255434 |
| 6 | 2.64461711  | 4.74703080  | -2.62820937 |
| 1 | 2.70327790  | 5.36645227  | -3.52489602 |
| 6 | 2.46170155  | 5.32959812  | -1.39995228 |
| 1 | 2.37540623  | 6.41437960  | -1.31602545 |
| 6 | 2.34148967  | 4.54096106  | -0.21251122 |
| 6 | 2.67850227  | -0.95884329 | -2.56417352 |
| 6 | 1.70219855  | -3.13476997 | -3.11403241 |
| 1 | 1.47489177  | -3.54373743 | -4.11351425 |
| 1 | 2.69847575  | -3.47284611 | -2.79587882 |
| 6 | 0.64717504  | -3.58837131 | -2.09929749 |
| 1 | 0.46198368  | -4.66886076 | -2.19537082 |
| 1 | 0.99718265  | -3.38228151 | -1.07264265 |
| 6 | -0.56612947 | -1.46473998 | -2.42673126 |
| 1 | -0.22368721 | -1.01343435 | -1.47555293 |
| 1 | -1.56324071 | -1.07040174 | -2.66688703 |
| 6 | 0.41800400  | -1.09207903 | -3.55271824 |
| 1 | 0.07180798  | -1.49396799 | -4.52053260 |
| 1 | 0.49255204  | 0.00120227  | -3.62838211 |
| 6 | -1.79075071 | -3.64837036 | -2.29665395 |
| 6 | -3.09994761 | -2.90136448 | -2.08246125 |
| 6 | -4.15007210 | -3.11981737 | -3.00000986 |
| 1 | -3.98820254 | -3.72119846 | -3.89526015 |
| 6 | -5.37515855 | -2.55674951 | -2.72017898 |
| 6 | -5.58602738 | -1.86214901 | -1.49881659 |
| 6 | -6.84907010 | -1.32699137 | -1.10919045 |
| 1 | -7.68494626 | -1.40637764 | -1.80614804 |
| 6 | -7.02380505 | -0.76095720 | 0.12096020  |
| 1 | -8.00144692 | -0.38119441 | 0.42215315  |
| 6 | -5.94835435 | -0.68564244 | 1.05435505  |
| 6 | -6.09924021 | -0.20475404 | 2.38271256  |
| 6 | -5.03677132 | -0.22896878 | 3.25829371  |
| 1 | -5.14885633 | 0.06476045  | 4.30253245  |

|    |             |             |             |
|----|-------------|-------------|-------------|
| 6  | -3.78530917 | -0.65483059 | 2.76357233  |
| 6  | -4.64115809 | -1.14142101 | 0.68942368  |
| 6  | -4.45445092 | -1.75092220 | -0.62891421 |
| 6  | -2.64416398 | -0.82521782 | 3.75689268  |
| 6  | -0.23693376 | -0.64473008 | 4.16075921  |
| 1  | 0.38179887  | -1.25119381 | 3.47624409  |
| 1  | -0.55611952 | -1.28341427 | 4.99813873  |
| 6  | 0.57548736  | 0.54760731  | 4.67841325  |
| 1  | 0.06776971  | 1.01514993  | 5.53946983  |
| 1  | 1.57899229  | 0.21460586  | 4.97873943  |
| 6  | -0.55801697 | 2.02858514  | 3.08636074  |
| 1  | -0.39164580 | 2.79773520  | 2.31989655  |
| 1  | -1.17178934 | 2.45901836  | 3.89627368  |
| 6  | -1.26849738 | 0.81571220  | 2.45518894  |
| 1  | -2.24888902 | 1.12597139  | 2.06840288  |
| 1  | -0.66387470 | 0.43321365  | 1.60993681  |
| 6  | 1.87472738  | 1.64521811  | 2.91694892  |
| 57 | 3.81621941  | -0.17917218 | 0.64231068  |
| 8  | 2.80768923  | 0.83330821  | 3.00608119  |
| 8  | 3.49223633  | -1.45229182 | -1.76931966 |
| 7  | 5.98849649  | 1.75292768  | -0.05184644 |
| 8  | 6.87294116  | 2.53749858  | -0.33056172 |
| 8  | 5.27075587  | 1.87057053  | 1.02811153  |
| 8  | 5.68294654  | 0.74666971  | -0.81576223 |
| 7  | 5.63076196  | -2.16710872 | 1.82583746  |
| 8  | 6.34233465  | -3.00873724 | 2.32883622  |
| 8  | 5.18382203  | -1.13910750 | 2.49263164  |
| 8  | 5.25488220  | -2.21977130 | 0.58066993  |
| 7  | 1.23575925  | -1.71223959 | 1.03732391  |
| 8  | 0.19218640  | -2.34153444 | 1.12160542  |
| 8  | 2.33316259  | -2.09995936 | 1.57049541  |
| 8  | 1.28872951  | -0.57424168 | 0.38269150  |

\$end

Energy = -13306.7180661271

Conformer\_1-Cl\_H3O+

mult=1 charge=1

cartesian

set=L1

|    |             |             |             |
|----|-------------|-------------|-------------|
| 17 | 3.96726606  | 6.57708379  | 1.78469703  |
| 17 | 4.57706264  | 3.31773199  | -5.08350526 |
| 17 | -6.32761090 | -3.36018909 | -3.51116896 |
| 17 | -7.16280790 | 0.08952968  | 3.16696675  |
| 8  | -1.28311836 | -4.92113017 | -2.71798187 |
| 8  | -2.38219475 | -0.99819663 | 5.05156683  |
| 7  | 2.90873476  | 2.21976314  | 0.97134261  |
| 7  | 3.23258473  | 1.11308056  | -1.44405299 |
| 7  | -2.79413124 | -2.47411458 | -0.79068061 |
| 7  | -3.10089744 | -1.27915636 | 1.64588593  |
| 7  | 2.07544945  | -1.67105455 | -2.83173876 |
| 7  | -0.17511280 | -3.09586061 | -1.89605059 |
| 7  | 1.24784234  | 1.23910663  | 3.42488412  |
| 7  | -0.82120771 | -0.69668924 | 3.40938066  |
| 6  | 3.58327705  | 4.91958725  | 1.45665488  |
| 6  | 3.14574073  | 4.09697804  | 2.47259712  |
| 1  | 3.07316180  | 4.45800852  | 3.49906050  |
| 6  | 2.79414644  | 2.75459681  | 2.18442783  |
| 6  | 3.38305257  | 3.02247746  | -0.00942166 |
| 6  | 3.53768707  | 2.43752760  | -1.30949327 |
| 6  | 3.34303725  | 0.44058433  | -2.60284577 |
| 6  | 3.76748141  | 1.13700360  | -3.74181316 |
| 1  | 3.87730319  | 0.59867210  | -4.68328170 |
| 6  | 4.07123638  | 2.48786929  | -3.66041090 |
| 6  | 3.98026630  | 3.18824424  | -2.42104622 |
| 6  | 4.30346985  | 4.56219592  | -2.22542511 |
| 1  | 4.65405735  | 5.14503365  | -3.07785988 |
| 6  | 4.18632964  | 5.13677255  | -0.98675815 |
| 1  | 4.44740653  | 6.18678518  | -0.84264259 |
| 6  | 3.72762931  | 4.39340679  | 0.14049200  |
| 6  | 3.27334600  | -1.07752890 | -2.63688831 |

|   |             |             |             |
|---|-------------|-------------|-------------|
| 6 | 2.01408678  | -3.12885729 | -3.03316210 |
| 1 | 1.60965399  | -3.31871244 | -4.04249599 |
| 1 | 3.04093509  | -3.51660880 | -2.97219390 |
| 6 | 1.11321413  | -3.77728077 | -1.97977398 |
| 1 | 0.90869706  | -4.82278164 | -2.25432938 |
| 1 | 1.60744212  | -3.74488182 | -0.99171552 |
| 6 | -0.08702888 | -1.66358395 | -1.67039878 |
| 1 | 0.36342449  | -1.46706503 | -0.67868205 |
| 1 | -1.09385372 | -1.23087917 | -1.66801656 |
| 6 | 0.77412343  | -1.00310871 | -2.76167216 |
| 1 | 0.27003300  | -1.10004212 | -3.73998694 |
| 1 | 0.89349183  | 0.06584869  | -2.52512334 |
| 6 | -1.31839717 | -3.79701636 | -2.23449377 |
| 6 | -2.66374863 | -3.17134344 | -1.91339597 |
| 6 | -3.73425392 | -3.49818801 | -2.77106736 |
| 1 | -3.55776301 | -4.11469601 | -3.65265010 |
| 6 | -4.98922858 | -3.02999176 | -2.44484860 |
| 6 | -5.19303329 | -2.30849225 | -1.23665401 |
| 6 | -6.46977944 | -1.84404465 | -0.80330954 |
| 1 | -7.33300701 | -2.01491577 | -1.44849198 |
| 6 | -6.61965642 | -1.22304863 | 0.40409028  |
| 1 | -7.60433891 | -0.88980166 | 0.73591077  |
| 6 | -5.50688623 | -1.02529789 | 1.27402787  |
| 6 | -5.61916002 | -0.46297342 | 2.57483467  |
| 6 | -4.51246989 | -0.37925698 | 3.39081835  |
| 1 | -4.57492716 | -0.02716165 | 4.42035782  |
| 6 | -3.26749227 | -0.79536084 | 2.87138966  |
| 6 | -4.19707891 | -1.42978360 | 0.86886693  |
| 6 | -4.03501204 | -2.08159904 | -0.42868253 |
| 6 | -2.11744622 | -0.81324309 | 3.86842887  |
| 6 | 0.26344675  | -0.81022188 | 4.38517900  |
| 1 | 1.03204233  | -1.49358865 | 3.98373091  |
| 1 | -0.16438156 | -1.23064327 | 5.30614599  |
| 6 | 0.87306615  | 0.56072473  | 4.67643014  |
| 1 | 0.13588308  | 1.18294088  | 5.21623651  |

|   |             |             |             |
|---|-------------|-------------|-------------|
| 1 | 1.78195641  | 0.47670367  | 5.28843477  |
| 6 | 0.18170356  | 1.32284181  | 2.42358856  |
| 1 | 0.57242758  | 1.73402334  | 1.48274048  |
| 1 | -0.62301972 | 1.98330725  | 2.80086220  |
| 6 | -0.40579746 | -0.07438570 | 2.16004151  |
| 1 | -1.26431508 | -0.02493010 | 1.47944192  |
| 1 | 0.36606363  | -0.71037489 | 1.68677566  |
| 6 | 2.43637572  | 1.90368748  | 3.39047929  |
| 8 | 3.26553446  | 1.90417021  | 4.29696252  |
| 8 | 4.36844480  | -1.62586705 | -2.56425776 |
| 8 | 0.04252513  | 1.77045963  | -1.06306493 |
| 1 | -0.11837480 | 2.67656614  | -1.38381269 |
| 1 | -0.85885059 | 1.43765847  | -0.89860441 |
| 1 | 2.90424165  | 0.68297704  | -0.55978084 |

\$end

Energy = -4047.1934026583
